# Supplementary material for: Caffeic acid phenethyl ester attenuates osteoarthritis progression by activating NRF2/HO-1 and inhibiting the NF-κB signaling pathway
Source: PubMed Central journal article supplement — Int J Mol Med. 2022 Sep 14;50(5):134. doi: 10.3892/ijmm.2022.5190 (PMC9542543; doi:10.3892/ijmm.2022.5190), 2022-09-14

Figure S1. Effects of CAPE on the expression of NRF2. CAPE, caffeic acid phenethyl ester; NRF2, nuclear factor erythroid 2-related factor 2.

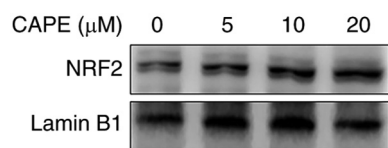

Figure S2. Effects of siRNA on the expression of NRF2. (A) Imaging of cells following transfection with NC FAM-siRNA. (B) The expression of NRF2 was detected using western blot analysis. CAPE, caffeic acid phenethyl ester; NRF2, nuclear factor erythroid 2-related factor 2.

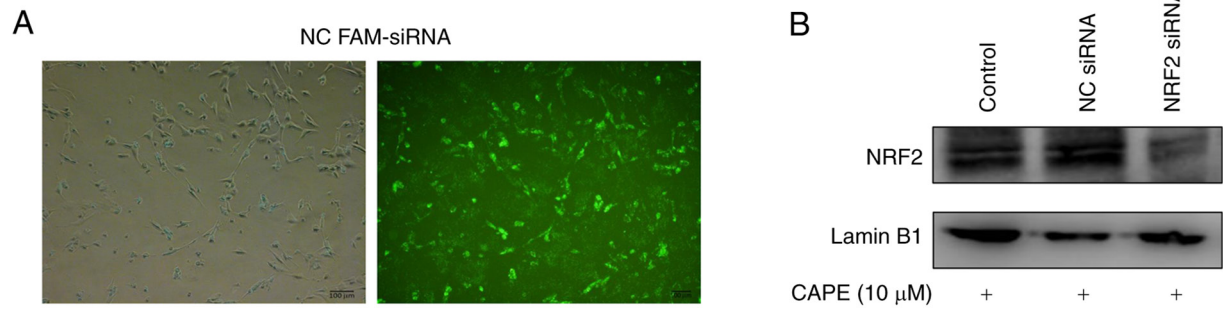

Supplement: Supplementary_Data.pdf [file Supplementary_Data.pdf]
